# Supplementary material for: Aluminum complexes of the redox-active [ONO] pincer ligand
Source: Royal Society of Chemistry journal article supplement (doi:10.1039/c2dt30295k), 2012-01-01
Supplement: c2dt30295k.pdf [file c2dt30295k.pdf]

## Aluminum complexes of the redox-active [ONO] pincer ligand

*Géza Szigethy, Alan F. Heyduk\**

Department of Chemistry, University of California, Irvine, California 92697, USA

### Supporting Information

#### Contents

- **Figure S1.** UV-vis-NIR spectra of [ONO<sup>q</sup>]Al(acacPh<sub>2</sub>)Cl (**2**) and [ONO<sup>sq</sup>]Al(acacPh<sub>2</sub>)(py) (**4**). S2
- <sup>1</sup>H and <sup>13</sup>C{<sup>1</sup>H} NMR spectra of diamagnetic complexes **1a**, **1b**, **2**, and **3** S2
- Crystallographic refinement details for complexes **1b**, **2**, **6**, and **8** S7

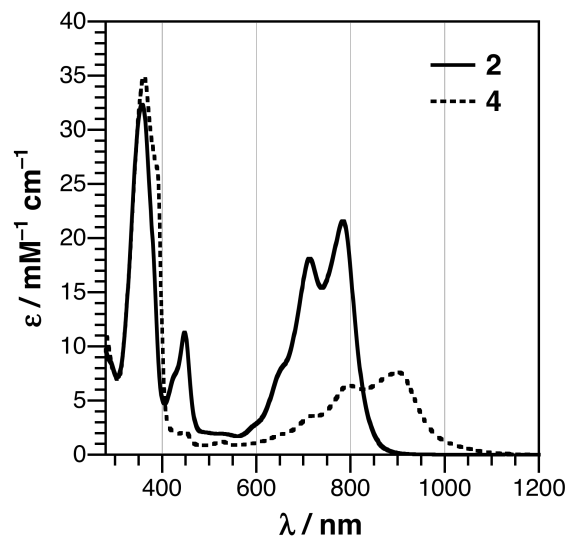

**Figure S1.** UV-vis-NIR spectra of  $[\text{ONO}^q]\text{Al}(\text{acacPh}_2)\text{Cl}$  (**2**) and  $[\text{ONO}^{\text{sq}}]\text{Al}(\text{acacPh}_2)(\text{py})$  (**4**) in  $\text{C}_6\text{H}_6$  at 298 K.

### Supplemental $^1\text{H}$ and $^{13}\text{C}\{^1\text{H}\}$ NMR Spectra of Diamagnetic Compounds

NMR spectra were collected with Bruker Avance 500 MHz spectrometers ( $^1\text{H}$  500 MHz,  $^{13}\text{C}$  128 MHz) in either  $\text{C}_6\text{D}_6$  or  $\text{CD}_3\text{CN}$  solvents that were degassed by several freeze-pump-thaw cycles, dried with sodium benzophenone ketyl radical or  $\text{CaH}_2$ , respectively, and vacuum-distilled before use.  $^1\text{H}$  and  $^{13}\text{C}\{^1\text{H}\}$  NMR spectra were referenced to the residual  $^1\text{H}$  and  $^{13}\text{C}$  impurities in the solvent (7.15 and 128.02 for  $\text{C}_6\text{D}_6$ ; 1.94 and 1.24 for  $\text{CD}_3\text{CN}$ , respectively). NMR spectra were measured at 298 K and chemical shifts are reported by using the standard  $\delta$  notation in parts per million.

[ONHO<sup>cat</sup>]HAICl(OEt<sub>2</sub>) (1a): <sup>1</sup>H NMR (C<sub>6</sub>D<sub>6</sub>):

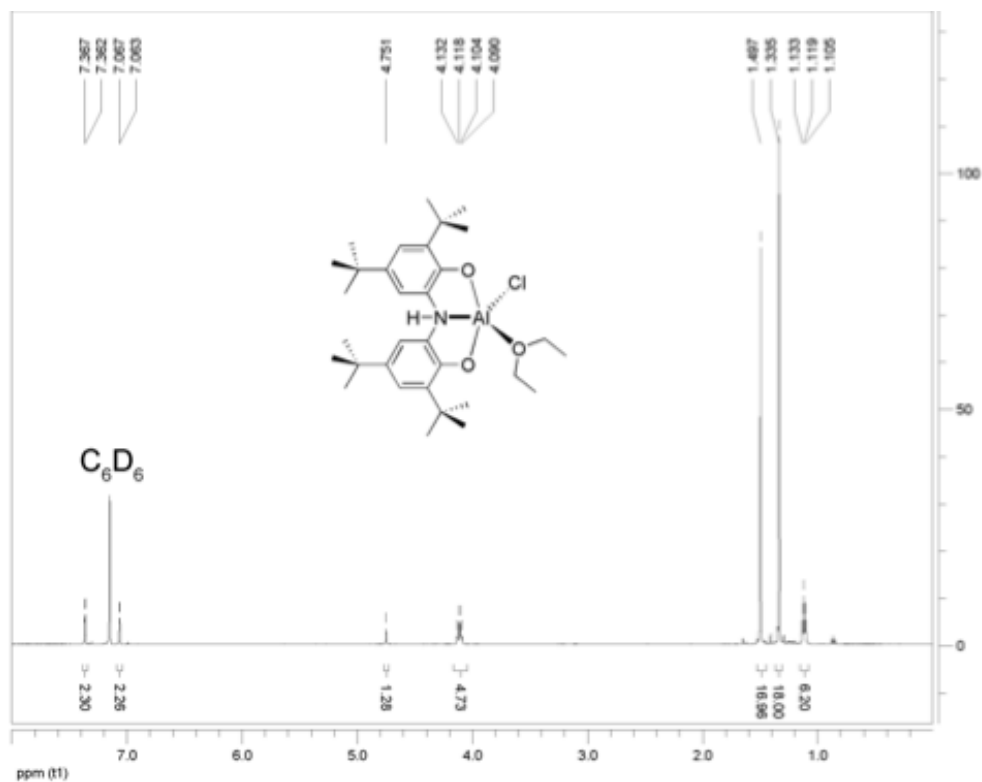

<sup>13</sup>C{<sup>1</sup>H} NMR (C<sub>6</sub>D<sub>6</sub>):

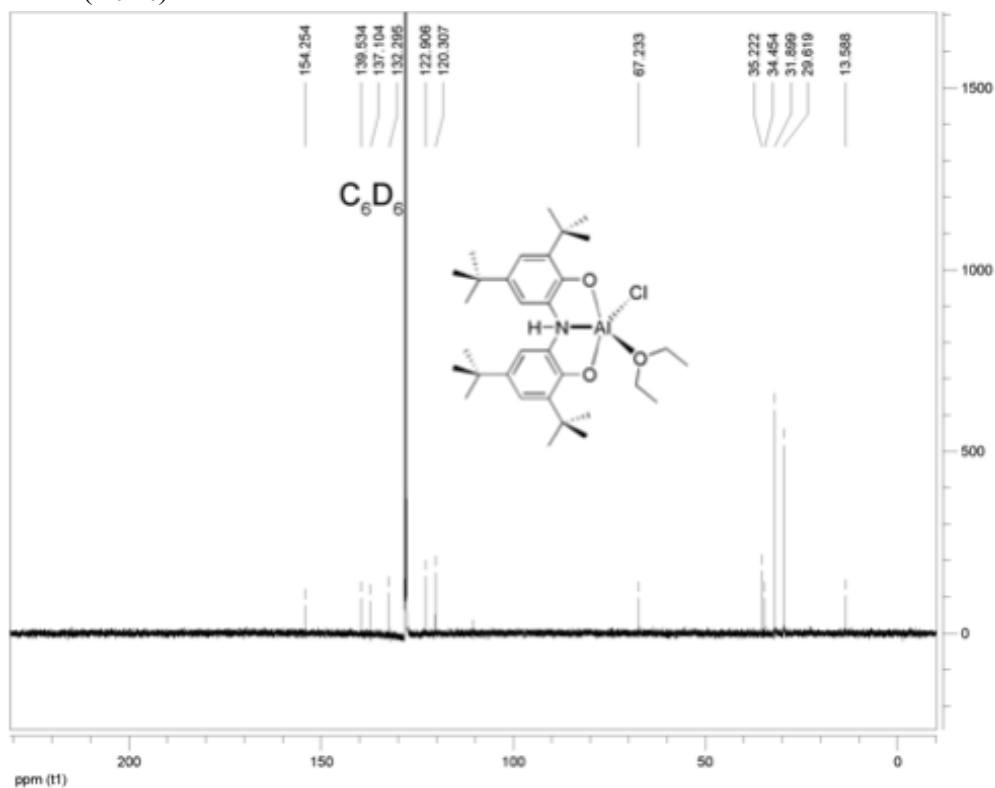

[ONHO<sup>cat</sup>]AlBr(THF) (1b): <sup>1</sup>H NMR (C<sub>6</sub>D<sub>6</sub>):

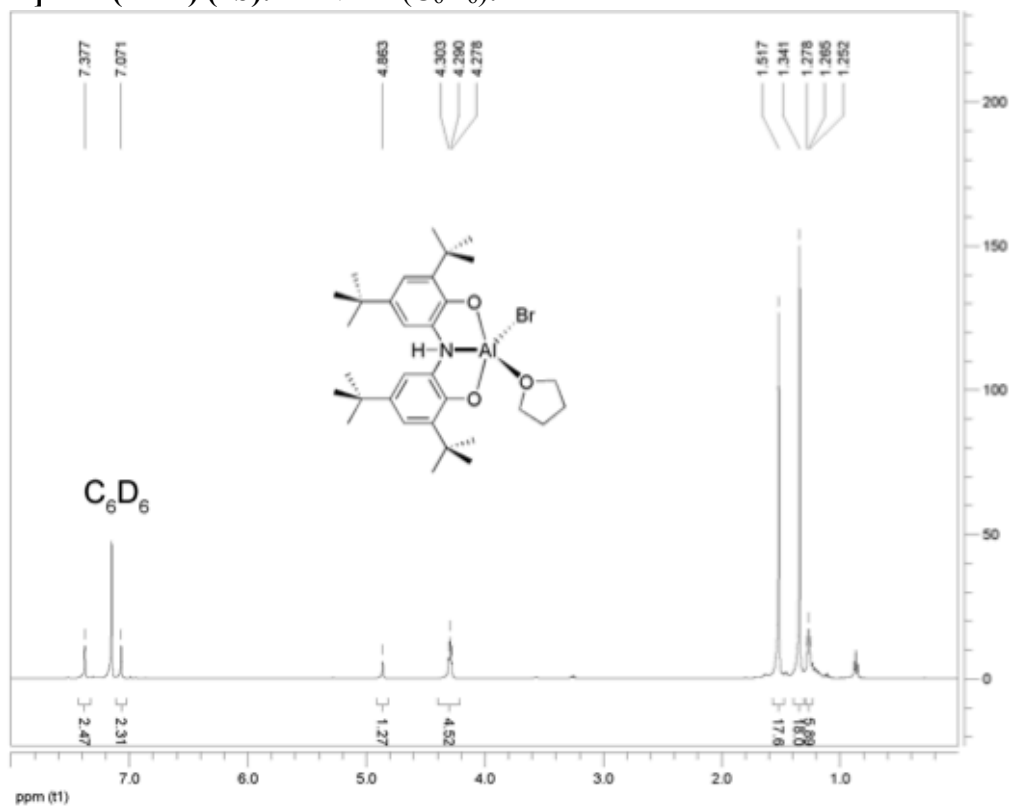

<sup>13</sup>C {<sup>1</sup>H} NMR (C<sub>6</sub>D<sub>6</sub>):

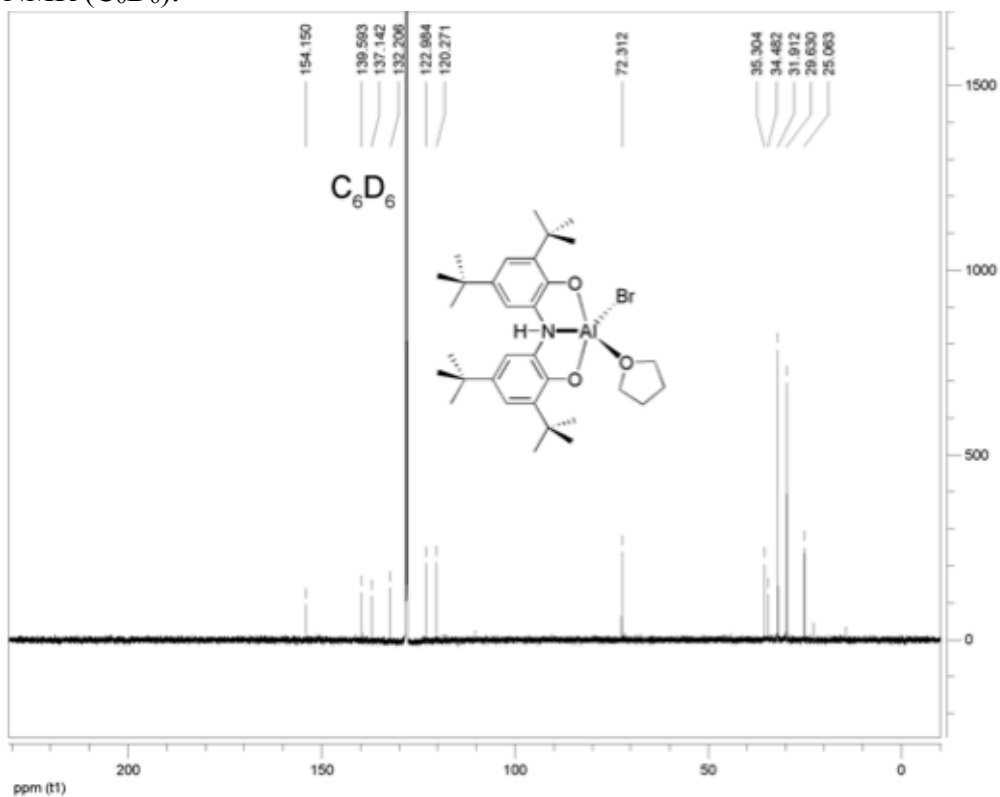

[ONO<sup>q</sup>]Al(acacPh<sub>2</sub>)Cl (2): <sup>1</sup>H NMR (C<sub>6</sub>D<sub>6</sub>):

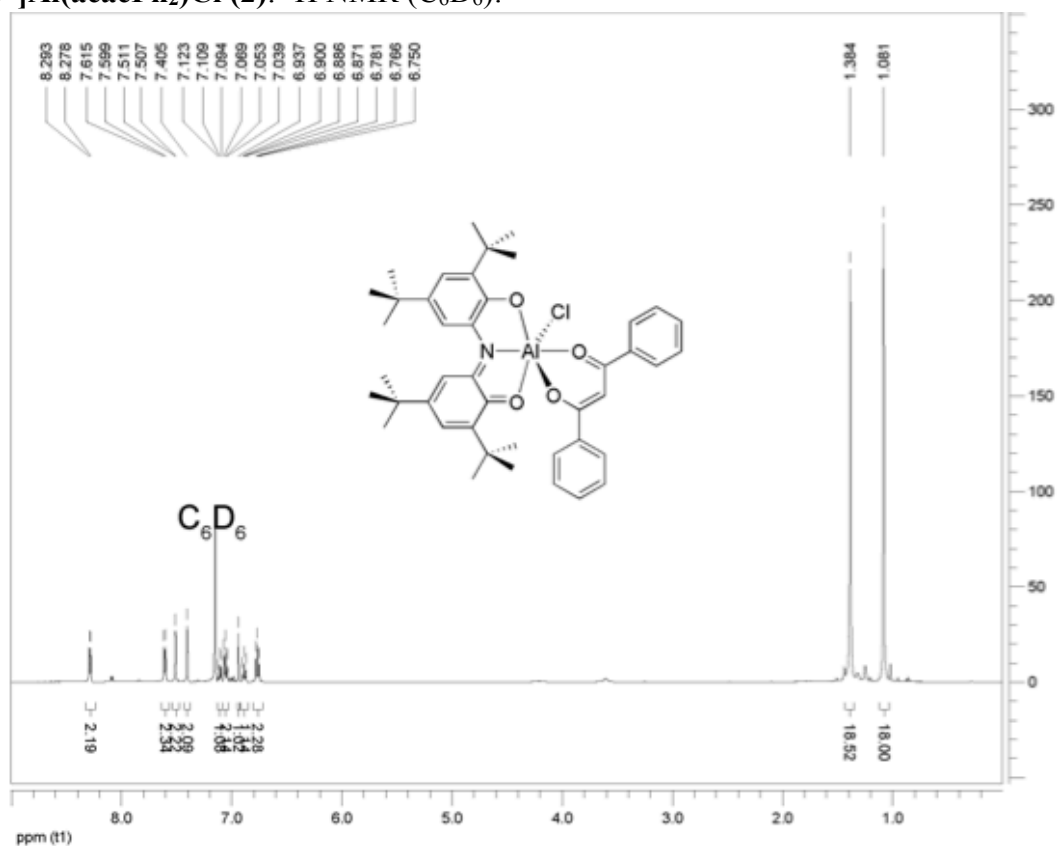

<sup>13</sup>C{<sup>1</sup>H} NMR (C<sub>6</sub>D<sub>6</sub>):

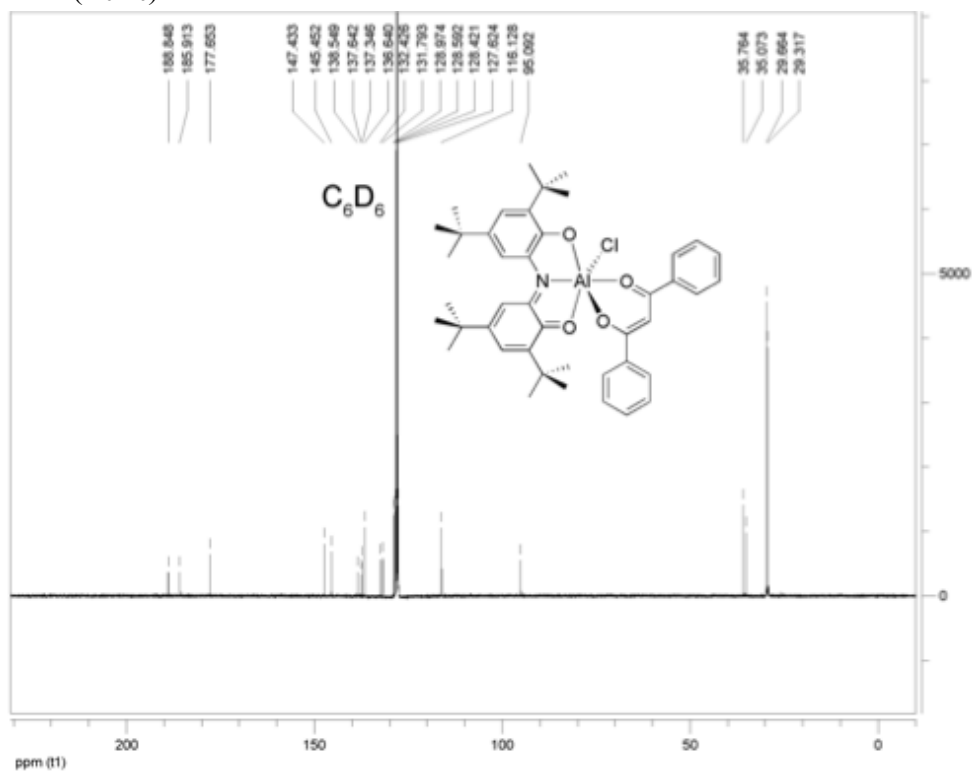



### Crystallographic Refinement Details

*[ONHO<sup>cat</sup>]AlBr(THF) (1b)*: A hemisphere of data was collected on a colorless plate of approximate dimensions  $0.57 \times 0.17 \times 0.10$  mm using a 25 sec/frame scan time. The diffraction symmetry was  $2/m$  and the systematic absences were consistent with the monoclinic space group  $P2_1/n$  that was later determined to be correct.

*[ONO<sup>q</sup>]Al(acacPh<sub>2</sub>)Cl (2)*: A hemisphere of data was collected on a black prism of dimensions  $0.38 \times 0.20 \times 0.19$  mm using a 45 sec/frame scan time. The diffraction symmetry was  $2/m$  and the systematic absences were consistent with the monoclinic space group  $P2_1/n$  that was later determined to be correct.

*[ONO]Al(o-O<sub>2</sub>C<sub>6</sub>Cl<sub>4</sub>)(py) (6)*: A hemisphere of diffraction data was collected on a black block of dimensions  $0.20 \times 0.12 \times 0.10$  mm using a 60 sec/frame scan time. The diffraction symmetry was  $2/m$  and the systematic absences were consistent with the monoclinic space group  $P2_1/c$  that was later determined to be correct. There was a pocket of disordered solvent that was positioned across an inversion center. Although diethyl-ether molecules could be seen in this disorder, modeling them using standard modeling procedures was not very stable. Additionally, the largest Q-peak was directly on the inversion center too far from another atom to be included in reasonable disorder modeling. Thus, the program SQUEEZE<sup>1</sup> by Spek et. a. in the PLATON<sup>2</sup> software suite was used to calculate the electron count in this solvent pocket at 69 electrons. This corresponds roughly to 1.5 diethyl-ether molecules, resulting in a total of 3 disordered ether molecules per unit cell, consistent with the disorder observed in the structure during initial refinement.

*[ONO]Al(o-O<sub>2</sub>C<sub>16</sub>H<sub>8</sub>)(py) (8)*: A hemisphere of diffraction data was collected on a black plate of dimensions  $0.27 \times 0.18 \times 0.06$  mm using a 35 sec/frame scan time. The diffraction

symmetry was  $2/m$  and the systematic absences were consistent with the monoclinic space group  $P2_1/c$  that was later determined to be correct. One of the two THF molecules was disordered over two positions with a freely-refined occupancy of 65:35, and was modeled using standard distance restraints.

### References

1. P. Van Der Sluis and A. L. Spek, *Acta Cryst.*, 1990, **A46**, 194-201.
2. A. L. Spek, *J. Appl. Cryst.*, 2003, **36**, 7-13.
